# Supplementary material for: Optimizing in vitro fertilization in four Caribbean coral species
Source: PeerJ. 2025 Jan 31;13:e18918. doi: 10.7717/peerj.18918 (PMC11789651; doi:10.7717/peerj.18918)
Supplement: Supplemental Information 2 — Fertilization success for each assay. [file peerj-13-18918-s002.xlsx]

## Sheet: Raw data
Year	Month	Assay	Species	Condition	Fertilized eggs	Unfertilized eggs	Total number of eggs	Fertilization success (%)
2019	October	1	cnat	0	0	51	51	0
2019	October	1	cnat	0	0	67	67	0
2019	October	1	cnat	0	1	70	71	1.40845
2019	October	1	cnat	2.02531	0	66	66	0
2019	October	1	cnat	2.02531	0	71	71	0
2019	October	1	cnat	2.02531	1	60	61	1.63934
2019	October	1	cnat	4.02531	31	50	81	38.2716
2019	October	1	cnat	4.02531	38	26	64	59.375
2019	October	1	cnat	4.02531	43	23	66	65.1515
2019	October	1	cnat	6.02531	56	1	57	98.2456
2019	October	1	cnat	6.02531	86	1	87	98.8506
2019	October	1	cnat	6.02531	67	0	67	100
2019	October	1	cnat	8.02531	73	1	74	98.6486
2019	October	1	cnat	8.02531	60	0	60	100
2019	October	1	cnat	8.02531	72	0	72	100
2019	October	1	cnat	9.02531	41	8	49	83.6735
2019	October	1	cnat	9.02531	48	5	53	90.566
2019	October	1	cnat	9.02531	30	3	33	91
2019	July	1	dlab	0	0	28	28	0
2019	July	1	dlab	0	0	38	38	0
2019	July	1	dlab	0	0	33	33	0
2019	July	1	dlab	0	2	23	25	8
2019	July	1	dlab	0	5	34	39	12.8205
2019	July	1	dlab	0.829947	0	34	34	0
2019	July	1	dlab	0.829947	0	33	33	0
2019	July	1	dlab	0.829947	0	37	37	0
2019	July	1	dlab	0.829947	2	64	66	3.0303
2019	July	1	dlab	0.829947	5	60	65	7.69231
2019	July	1	dlab	2.82995	0	43	43	0
2019	July	1	dlab	2.82995	0	53	53	0
2019	July	1	dlab	2.82995	0	50	50	0
2019	July	1	dlab	2.82995	1	56	57	1.75439
2019	July	1	dlab	2.82995	2	81	83	2.40964
2019	July	1	dlab	4.82995	69	2	71	97.1831
2019	July	1	dlab	4.82995	43	1	44	97.7273
2019	July	1	dlab	4.82995	61	0	61	100
2019	July	1	dlab	4.82995	60	0	60	100
2019	July	1	dlab	4.82995	66	0	66	100
2019	July	1	dlab	4.82995	96	0	96	100
2019	July	1	dlab	6.82995	56	3	59	94.9153
2019	July	1	dlab	6.82995	39	1	40	97.5
2019	July	1	dlab	6.82995	51	0	51	100
2019	July	1	dlab	6.82995	69	0	69	100
2019	July	1	dlab	6.82995	58	0	58	100
2019	July	1	dlab	6.82995	46	0	46	100
2019	July	1	dlab	7.82995	35	5	40	87.5
2019	July	1	dlab	7.82995	45	4	49	91.8367
2019	July	1	dlab	7.82995	58	0	58	100
2019	July	1	dlab	7.82995	57	0	57	100
2019	July	1	dlab	7.82995	44	0	44	100
2019	July	1	dlab	7.82995	65	0	65	100
2020	October	1	ofav	0	0	165	165	0
2020	October	1	ofav	0	0	233	233	0
2020	October	1	ofav	0	0	176	176	0
2020	October	1	ofav	2.80414	1	104	105	1
2020	October	1	ofav	2.80414	1	160	161	1
2020	October	1	ofav	2.80414	3	126	129	2
2020	October	1	ofav	3.80414	29	199	228	13
2020	October	1	ofav	3.80414	26	161	187	14
2020	October	1	ofav	3.80414	24	119	143	17
2020	October	1	ofav	4.80414	61	57	118	52
2020	October	1	ofav	4.80414	107	55	162	66
2020	October	1	ofav	4.80414	62	24	86	72
2020	October	1	ofav	5.80414	136	18	154	88
2020	October	1	ofav	5.80414	142	15	157	90
2020	October	1	ofav	5.80414	142	15	157	90
2020	October	1	ofav	6.80414	93	22	115	81
2020	October	1	ofav	6.80414	115	15	130	88
2020	October	1	ofav	6.80414	119	15	134	89
2019	September	1	pstr	0	0	20	20	0
2019	September	1	pstr	0	1	15	16	6
2019	September	1	pstr	0	2	23	25	8
2019	September	1	pstr	2.22789	0	33	33	0
2019	September	1	pstr	2.22789	3	48	51	6
2019	September	1	pstr	2.22789	12	22	34	35
2019	September	1	pstr	4.22789	11	24	35	31
2019	September	1	pstr	4.22789	12	20	32	38
2019	September	1	pstr	4.22789	13	17	30	43
2019	September	1	pstr	6.22789	46	2	48	96
2019	September	1	pstr	6.22789	41	1	42	98
2019	September	1	pstr	6.22789	53	0	53	100
2019	September	1	pstr	8.22789	34	0	34	100
2019	September	1	pstr	8.22789	50	0	50	100
2019	September	1	pstr	8.22789	49	0	49	100
2019	September	1	pstr	9.22789	46	1	47	98
2019	September	1	pstr	9.22789	40	0	40	100
2019	September	1	pstr	9.22789	43	0	43	100
2019	October	2	cnat	2.33333	89	2	91	98
2019	October	2	cnat	2.33333	93	0	93	100
2019	October	2	cnat	2.33333	60	0	60	100
2019	October	2	cnat	2.83333	61	2	63	97
2019	October	2	cnat	2.83333	73	2	75	97
2019	October	2	cnat	2.83333	77	1	78	99
2019	October	2	cnat	3.33333	47	2	49	96
2019	October	2	cnat	3.33333	64	1	65	98
2019	October	2	cnat	3.33333	48	0	48	100
2019	October	2	cnat	4.83333	67	3	70	96
2019	October	2	cnat	4.83333	69	3	72	96
2019	October	2	cnat	4.83333	51	1	52	98
2019	October	2	cnat	6.83333	20	18	38	53
2019	October	2	cnat	6.83333	21	8	29	72
2019	October	2	cnat	6.83333	25	7	32	78
2019	July	2	dlab	1.83333	44	0	44	100
2019	July	2	dlab	1.83333	47	0	47	100
2019	July	2	dlab	1.83333	23	0	23	100
2019	July	2	dlab	1.83333	23	0	23	100
2019	July	2	dlab	1.83333	19	0	19	100
2019	July	2	dlab	1.83333	30	0	30	100
2019	July	2	dlab	2.33333	41	2	43	95.3488
2019	July	2	dlab	2.33333	51	0	51	100
2019	July	2	dlab	2.33333	41	0	41	100
2019	July	2	dlab	2.33333	38	0	38	100
2019	July	2	dlab	2.33333	37	0	37	100
2019	July	2	dlab	2.33333	24	0	24	100
2019	July	2	dlab	2.83333	43	1	44	97.7273
2019	July	2	dlab	2.83333	32	0	32	100
2019	July	2	dlab	2.83333	18	0	18	100
2019	July	2	dlab	2.83333	36	0	36	100
2019	July	2	dlab	2.83333	21	0	21	100
2019	July	2	dlab	2.83333	26	0	26	100
2019	July	2	dlab	3.33333	54	1	55	98.1818
2019	July	2	dlab	3.33333	38	0	38	100
2019	July	2	dlab	3.33333	38	0	38	100
2019	July	2	dlab	3.33333	24	0	24	100
2019	July	2	dlab	3.33333	46	0	46	100
2019	July	2	dlab	3.33333	31	0	31	100
2019	July	2	dlab	4.33333	38	1	39	97.4359
2019	July	2	dlab	4.33333	37	1	38	97.3684
2019	July	2	dlab	4.33333	38	0	38	100
2019	July	2	dlab	4.33333	32	0	32	100
2019	July	2	dlab	4.33333	41	0	41	100
2019	July	2	dlab	4.33333	27	0	27	100
2019	July	2	dlab	6.33333	0	30	30	0
2019	July	2	dlab	6.33333	0	50	50	0
2019	July	2	dlab	6.33333	2	69	71	2.8169
2019	July	2	dlab	6.33333	2	47	49	4.08163
2019	July	2	dlab	6.33333	2	53	55	3.63636
2019	July	2	dlab	6.33333	4	31	35	11.4286
2020	October	2	ofav	2.16667	103	27	130	79
2020	October	2	ofav	2.16667	278	49	327	85
2020	October	2	ofav	2.16667	110	20	130	85
2020	October	2	ofav	2.66667	165	14	179	92
2020	October	2	ofav	2.66667	183	17	200	92
2020	October	2	ofav	2.66667	136	11	147	93
2020	October	2	ofav	3.16667	163	18	181	90
2020	October	2	ofav	3.16667	140	12	152	92
2020	October	2	ofav	3.16667	166	12	178	93
2020	October	2	ofav	3.66667	137	14	151	91
2020	October	2	ofav	3.66667	154	13	167	92
2020	October	2	ofav	3.66667	162	13	175	93
2020	October	2	ofav	4.66667	109	16	125	87
2020	October	2	ofav	4.66667	113	14	127	89
2020	October	2	ofav	4.66667	118	11	129	91
2020	October	2	ofav	6.66667	113	50	163	69
2020	October	2	ofav	6.66667	141	52	193	73
2020	October	2	ofav	6.66667	120	31	151	79
2019	September	2	pstr	2.33333	34	1	35	97
2019	September	2	pstr	2.33333	43	1	44	98
2019	September	2	pstr	2.33333	49	0	49	100
2019	September	2	pstr	2.83333	46	2	48	96
2019	September	2	pstr	2.83333	58	2	60	97
2019	September	2	pstr	2.83333	54	1	55	98
2019	September	2	pstr	3.33333	52	2	54	96
2019	September	2	pstr	3.33333	50	1	51	98
2019	September	2	pstr	3.33333	44	0	44	100
2019	September	2	pstr	3.83333	51	2	53	96
2019	September	2	pstr	3.83333	59	2	61	97
2019	September	2	pstr	3.83333	34	0	34	100
2019	September	2	pstr	4.83333	55	3	58	95
2019	September	2	pstr	4.83333	35	2	37	95
2019	September	2	pstr	4.83333	44	2	46	96
2019	September	2	pstr	6.83333	41	12	53	77
2019	September	2	pstr	6.83333	41	7	48	85
2019	September	2	pstr	6.83333	43	3	46	93
2019	October	3	cnat	15	61	3	64	95
2019	October	3	cnat	15	74	0	74	100
2019	October	3	cnat	15	68	0	68	100
2019	October	3	cnat	30	57	1	58	98
2019	October	3	cnat	30	74	1	75	99
2019	October	3	cnat	30	53	0	53	100
2019	October	3	cnat	45	65	2	67	97
2019	October	3	cnat	45	75	1	76	99
2019	October	3	cnat	45	78	0	78	100
2019	October	3	cnat	60	60	3	63	95
2019	October	3	cnat	60	61	3	64	95
2019	October	3	cnat	60	69	2	71	97
2019	October	3	cnat	90	79	1	80	99
2019	October	3	cnat	90	89	0	89	100
2019	October	3	cnat	90	52	0	52	100
2019	October	3	cnat	120	61	1	62	98
2019	October	3	cnat	120	65	1	66	98
2019	October	3	cnat	120	49	0	49	100
2019	July	3	dlab	15	57	1	58	98.2759
2019	July	3	dlab	15	66	1	67	98.5075
2019	July	3	dlab	15	88	0	88	100
2019	July	3	dlab	15	70	0	70	100
2019	July	3	dlab	15	46	0	46	100
2019	July	3	dlab	15	75	0	75	100
2019	July	3	dlab	30	59	4	63	93.6508
2019	July	3	dlab	30	92	1	93	98.9247
2019	July	3	dlab	30	84	1	85	98.8235
2019	July	3	dlab	30	46	0	46	100
2019	July	3	dlab	30	64	0	64	100
2019	July	3	dlab	30	59	0	59	100
2019	July	3	dlab	45	42	0	42	100
2019	July	3	dlab	45	45	0	45	100
2019	July	3	dlab	45	40	0	40	100
2019	July	3	dlab	45	70	0	70	100
2019	July	3	dlab	45	36	0	36	100
2019	July	3	dlab	45	35	0	35	100
2019	July	3	dlab	60	56	1	57	98.2456
2019	July	3	dlab	60	62	0	62	100
2019	July	3	dlab	60	58	0	58	100
2019	July	3	dlab	60	43	0	43	100
2019	July	3	dlab	60	33	0	33	100
2019	July	3	dlab	60	46	0	46	100
2019	July	3	dlab	90	36	0	36	100
2019	July	3	dlab	90	15	0	15	100
2019	July	3	dlab	90	11	0	11	100
2019	July	3	dlab	90	11	0	11	100
2019	July	3	dlab	90	10	0	10	100
2019	July	3	dlab	90	21	0	21	100
2019	July	3	dlab	120	18	0	18	100
2019	July	3	dlab	120	42	0	42	100
2019	July	3	dlab	120	44	0	44	100
2019	July	3	dlab	120	48	0	48	100
2019	July	3	dlab	120	44	0	44	100
2019	July	3	dlab	120	68	0	68	100
2020	October	3	ofav	15	69	27	96	72
2020	October	3	ofav	15	138	34	172	80
2020	October	3	ofav	15	131	26	157	83
2020	October	3	ofav	30	120	27	147	82
2020	October	3	ofav	30	167	35	202	83
2020	October	3	ofav	30	156	21	177	88
2020	October	3	ofav	45	130	36	166	78
2020	October	3	ofav	45	121	21	142	85
2020	October	3	ofav	45	131	23	154	85
2020	October	3	ofav	60	128	26	154	83
2020	October	3	ofav	60	112	16	128	88
2020	October	3	ofav	60	109	11	120	91
2020	October	3	ofav	90	189	17	206	92
2020	October	3	ofav	90	203	15	218	93
2020	October	3	ofav	90	140	10	150	93
2020	October	3	ofav	120	141	14	155	91
2020	October	3	ofav	120	137	10	147	93
2020	October	3	ofav	120	187	11	198	94
2019	September	3	pstr	15	32	1	33	97
2019	September	3	pstr	15	44	0	44	100
2019	September	3	pstr	15	41	0	41	100
2019	September	3	pstr	30	40	2	42	95
2019	September	3	pstr	30	35	1	36	97
2019	September	3	pstr	30	37	0	37	100
2019	September	3	pstr	45	41	1	42	98
2019	September	3	pstr	45	39	0	39	100
2019	September	3	pstr	45	36	0	36	100
2019	September	3	pstr	60	58	0	58	100
2019	September	3	pstr	60	40	0	40	100
2019	September	3	pstr	60	52	0	52	100
2019	September	3	pstr	90	32	1	33	97
2019	September	3	pstr	90	35	1	36	97
2019	September	3	pstr	90	69	0	69	100
2019	September	3	pstr	120	41	0	41	100
2019	September	3	pstr	120	36	0	36	100
2019	September	3	pstr	120	34	0	34	100
